# Supplementary material for: Decoy bypass for appetite suppression in obese adults: role of synergistic nutrient sensing receptors GPR84 and FFAR4 on colonic endocrine cells
Source: PubMed Central journal article supplement (PMC8995825; doi:10.1136/gutjnl-2020-323219), 2021-06-03
Supplement: gutjnl-2020-323219supp002.pdf [file gutjnl-2020-323219supp002.pdf]

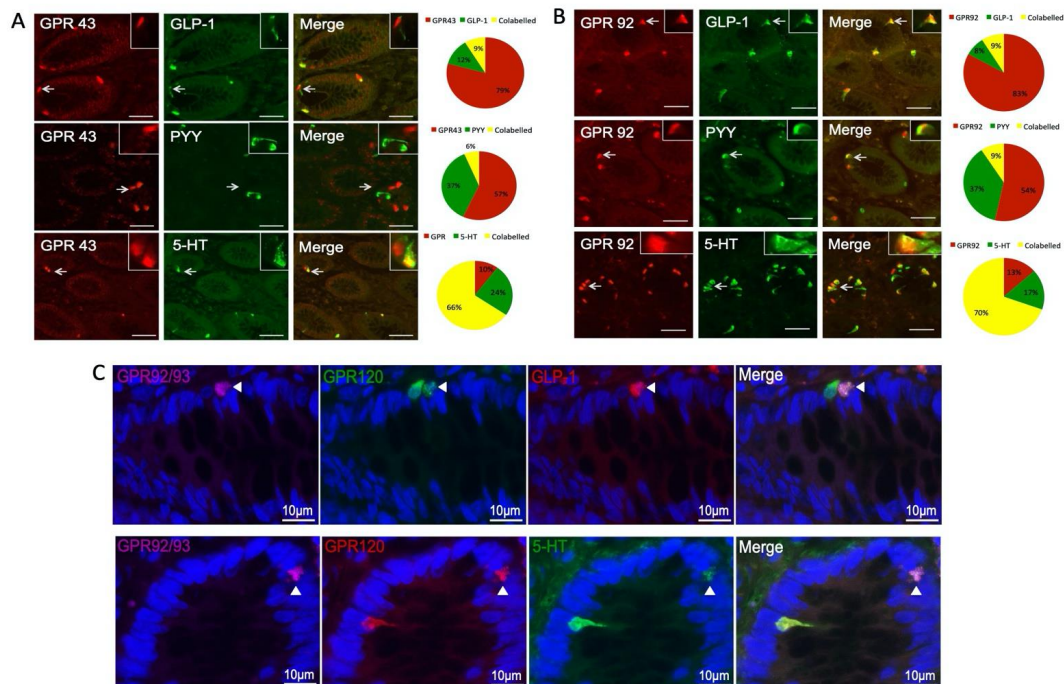

**Supplementary Figure 1: L-cells and EC cells co-express short chain fatty acid and amino acid sensing GPCRs.**

- A. GPR43, a short chain fatty acid receptor, is expressed on both L- and EC cells in the human colon, with the majority of expression being on EC cells.
- B. GPR92, peptide receptor, is similarly expressed on both EEC cell types, with 70% of EC cells displaying immunoreactivity.
- C. GPR92 is co-expressed with FFAR4 on GLP-1 containing L-cells and 5-HT containing EC cells of the human colon.
