# Supplementary material for: Decoy bypass for appetite suppression in obese adults: role of synergistic nutrient sensing receptors GPR84 and FFAR4 on colonic endocrine cells
Source: HighWire-hosted journal article supplement (doi:10.1136/gutjnl-2020-323219), 2021-06-03
Supplement: gutjnl-2020-323219supp003_data_supplement.pdf [file gutjnl-2020-323219supp003_data_supplement.pdf]

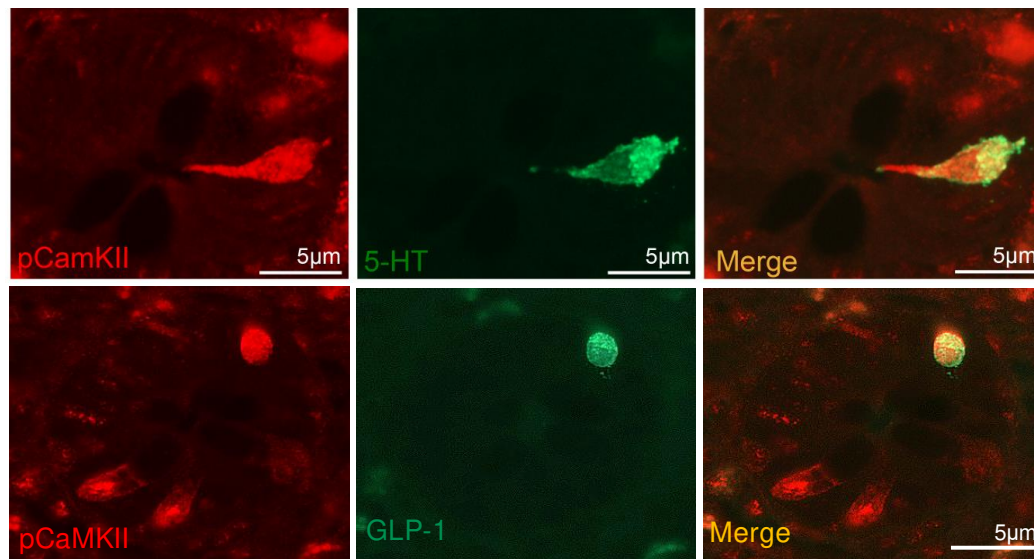

**Supplementary Figure 2: Stimulation with FFAR4 TUG891 induces pCaMKII expression in GLP-1 containing L-cells and 5-HT containing EC cells.**

- A. Human colonic mucosa stimulated with TUG891 (10 µM) leads to co-expression of pCaMKII and EC cells.
- B. Human colonic mucosa stimulated with TUG891 (10 µM) leads to co-expression of pCaMKII and L-cells.
