# Supplementary material for: Decoy bypass for appetite suppression in obese adults: role of synergistic nutrient sensing receptors GPR84 and FFAR4 on colonic endocrine cells
Source: PubMed Central journal article supplement (PMC8995825; doi:10.1136/gutjnl-2020-323219), 2021-06-03
Supplement: gutjnl-2020-323219supp004.pdf [file gutjnl-2020-323219supp004.pdf]

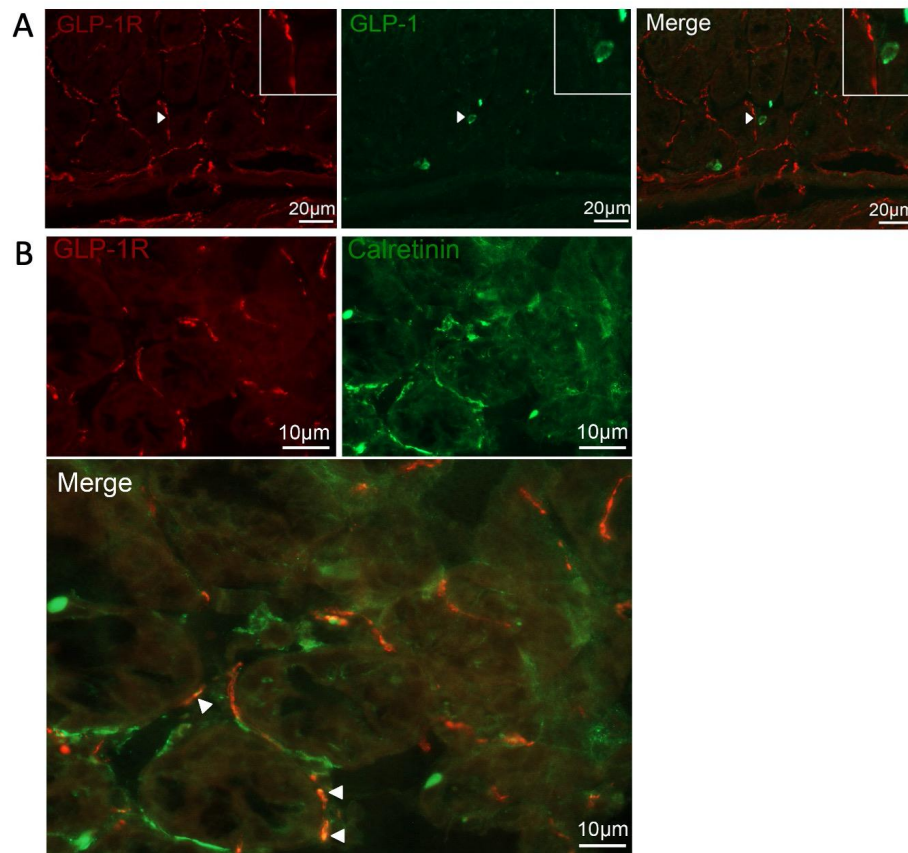

**Supplementary Figure 3: GLP-1 positive L-cells are closely associated with GLP-1 receptor (GLP-1R) expressed on calretinin positive neurons.**

- A. GLP-1R immunoreactivity is found in close apposition to GLP-1 containing L-cells in the mouse proximal colon.
- B. Calretinin (putative vagal afferent marker) positive nerve endings co-stain with GLP-1R (as shown by white arrows).
