# Supplementary material for: Decoy bypass for appetite suppression in obese adults: role of synergistic nutrient sensing receptors GPR84 and FFAR4 on colonic endocrine cells
Source: HighWire-hosted journal article supplement (doi:10.1136/gutjnl-2020-323219), 2021-06-03
Supplement: gutjnl-2020-323219supp005_data_supplement.pdf [file gutjnl-2020-323219supp005_data_supplement.pdf]

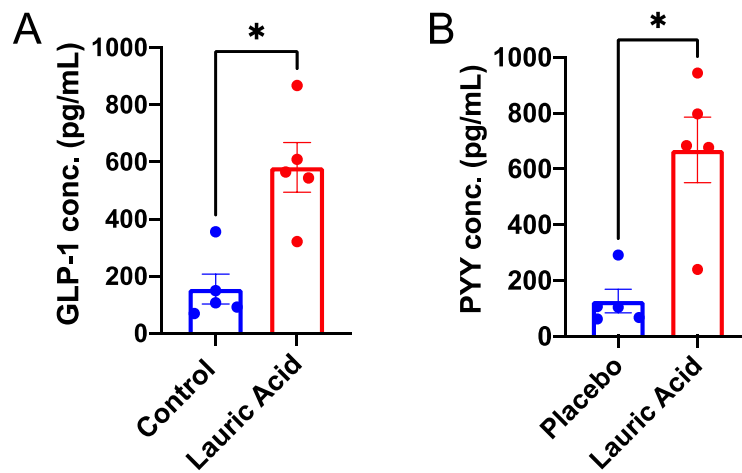

**Supplementary Figure 4: GPR84 agonist lauric acid increases release of GLP-1 and PYY from mouse explants.**

- Stimulation of mouse explant tissue with lauric acid ( $25 \text{ mmol}^{-1}$ ) significantly increases GLP-1 release compared to stimulation with buffer control.  $N=5/\text{group}$ .
- Stimulation of mouse explant tissue with lauric acid ( $25 \text{ mmol}^{-1}$ ) significantly increases PYY release compared to stimulation with buffer control.  $N=5/\text{group}$ .
