# Supplementary material for: Decoy bypass for appetite suppression in obese adults: role of synergistic nutrient sensing receptors GPR84 and FFAR4 on colonic endocrine cells
Source: PubMed Central journal article supplement (PMC8995825; doi:10.1136/gutjnl-2020-323219), 2021-06-03
Supplement: gutjnl-2020-323219supp007.pdf [file gutjnl-2020-323219supp007.pdf]

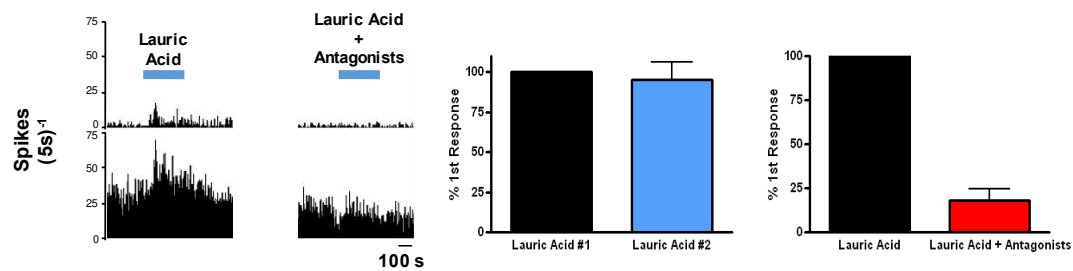

**Supplementary Figure 6: Afferent excitation by lauric acid is blocked by a combination of antagonists.**

Responses of afferent units to intraluminal perfusion with LA (25mM) are reproducible on second presentation, but absent after pre-administration of all three antagonists together with final concentrations - Granisetron (1 $\mu$ M), CYM 9484 (2 $\mu$ M) and Exendin 3-39 (100nM), ( $p=0.05$ , N=4-10).
